# Supplementary material
Source: publisher figshare collection journal article supplement (https://wiley.figshare.com/articles/dataset/_/3522536)
Supplement: Supplementary file 1 [file 1 › appendix-A.htm]

Ecological Archives E084-005-A1


### *Ecological Archives* E084-005-A1

### **Cajo J. F. ter Braak and Rampal S. Etienne. 2003. Improved Bayesian analysis of metapopulation data with an application to a tree frog metapopulation. *Ecology* 84:231–241.**

Appendix A. The jumping distribution
for missing data.

A pdf
version is also available.

In this appendix we describe our
Metropolis-Hastings (MH) algorithm for updating missing patch data. First we
introduce some notation. While updating, the model parameters Q are kept fixed.
For notational convenience we therefore drop the dependence on Q. Furthermore,
let the proposal for patch *i* in year *t* be denoted by *Xi*\*(*t*)
to distinguish it from the current state *Xi*(*t*). Of
course non-missing data are not updated, so that for these patches the proposed
state and current state are identical. By *X*-*i*(*t*)
we mean the states, at time *t*, of all patches except patch *i*,
and by *X*-*i* we mean the states of all patches in all
years, except *Xi*(*t*).

Our mechanism to generate a proposal
is motivated by the Gibbs sampler for updating a single patch (O'Hara et al.
2002). The proposal for a single patch must, of course, be either 1 or 0. The
ratio *fi* of the probabilities of these two states for patch
*i* conditional on *X*-*i* is

|  |  |
| --- | --- |
|  | A.1 |

By the definition of conditional
probabilities this becomes

|  |  |
| --- | --- |
|  | A.2 |

and using the properties of the
metapopulation model expressed in (3) and (2) in the main text, we can simplify
this to

|  |  |
| --- | --- |
|  | A.3 |

so that we, in fact, condition only
on the two adjacent years *t* - 1 and *t* + 1.

Because the numerator and the denominator
in (Eq. A.1) must sum to 1, we get

|  |  |
| --- | --- |
|  | A.4 |

Proposing *Xi*\*(*t*)=1
with probability *pi* (and leaving the other patches unchanged)
yields a Gibbs sampler, because (Eq. A.4) is a full conditional
distribution, and the acceptance ratio is equal to 1.

The Gibbs proposal is costly to
compute because each probability in (Eq. A.3) involving *X*(*t*+ 1) is already a product of *N* probabilities (see equation (2) in
the main text). The proposal can be simplified considerably by keeping *Xi*\*(*t*)
at its current state *Xi*(*t*) when calculating the transition
probabilities for *Xj*(*t* + 1) for *j* *i* in the numerator and denominator of (Eq. A.3). Then
2(*N*-1) probabilities cancel out and we obtain, instead of (Eq.
A.3),

|  |  |
| --- | --- |
|  | A.5 |

and, instead of (Eq.
A.4),

|  |  |
| --- | --- |
|  | A.6 |

In our MH-algorithm, we calculate
(Eq. A.6) for each missing patch in year *t* and then
propose, for each patch *i* independently, *Xi*\*(*t*)
= 1 with probability The jumping probability from
*X*(*t*) to *X*\*(*t*) at step *u* is thus

|  |  |
| --- | --- |
|  | A.7 |

By interchanging the role of *X*\*(*t*)
and *X*(*t*) in (Eq. A.5) - (Eq.
A.7), we also obtain *Ju*[(*X*(*t*)|*X*\*(*t*)]
so that with

|  |  |
| --- | --- |
|  | A.8 |

the acceptance ratio *r* is

|  |  |
| --- | --- |
|  | A.9 |

Updating missing values in the last
year (*T*) is not covered by the foregoing, but it can be done by Gibbs
sampling, because *P*[*Xi*(*T*)|*X*(*T* -
1),*X*-*i*(*T*)] = *P*[*Xi*(*T*)|*X*(*T*- 1)] which can be calculated explicitly.

It is instructive to see which proposals
are generated when *Ei* and *Ci* would be constant
over time (i.e., when the connectivity of a patch remains the same over time).
If *Xi*(*t* - 1) = 0 and *Xi*(*t* +
1) = 0, then = *CiEi*/(1
- *Ci*)2 which will be a small value if *Ci*
and/or *Ei* are small, so that is
also close to 0, so that with only a small probability a 1 is proposed in year
*t*. Similar considerations show that if *Xi*(*t* -
1) = 1 and *Xi*(*t* + 1) = 1, is
close to 1 so that with a large probability a 1 is proposed in year *t*.
If *Xi*(*t* - 1) *Xi*(*t* + 1), = (1 - *Ei*)/(1
- *Ci*) so that if *Ci* and *Ei*
are equal or both small, is about one half. All
of these proposals make intuitive sense.

In the tree frog case study, our
proposal mechanism accepted more than half of the proposals for a year. In simulated
data, with lower turnover rates, acceptance probabilities of over 0.9 were observed.
Our algorithm is expected to outperform the Gibbs sampler when many or all patches
in a particular year have missing data, as is the case in our pre-years. However,
if there is only one patch missing in a particular year, the Gibbs sampler is
the most efficient and in that case we use it in our computer software. In the
case study with its 202 patches and 25 pre-years, our MH-algorithm was about
10 times faster than an efficient implementation of the Gibbs sampler.

#### Literature cited

O'Hara, R. B., E. Arjas, H. Toivonen,
and I. Hanski. 2002. Bayesian analysis of metapopulation data.   
Ecology **83**:2408–2415.

---

  
[Back to E084-005]
